# Supplementary material for: Efficient green phosphor realized by Ce3+→Tb3+ energy transfer in Li3Sc2(PO4)3 for ultraviolet white light-emitting diodes
Source: Royal Society of Chemistry journal article supplement (doi:10.1039/c8cp05942j), 2018-01-01
Supplement: c8cp05942j1.pdf [file c8cp05942j1.pdf]

## **Supplementary Information**

**Title:** Efficient green phosphor realized by  $\text{Ce}^{3+} \rightarrow \text{Tb}^{3+}$  energy transfer in  $\text{Li}_3\text{Sc}_2(\text{PO}_4)_3$  for ultraviolet white light-emitting diodes

**Author(s):** Mengmeng Jiao<sup>a\*</sup>, Qinfeng Xu<sup>a</sup>, Mingliang Liu<sup>a</sup>, Chuanlu Yang<sup>a\*</sup>,  
Yongjiang Yu<sup>a</sup>

<sup>a</sup> School of Physics and Optoelectronic Engineering, Ludong University, Yantai  
264025, China.

E-mail: [jmm8996@163.com](mailto:jmm8996@163.com) (M. Jiao)

[ycl@ldu.edu.cn](mailto:ycl@ldu.edu.cn) (C. Yang)

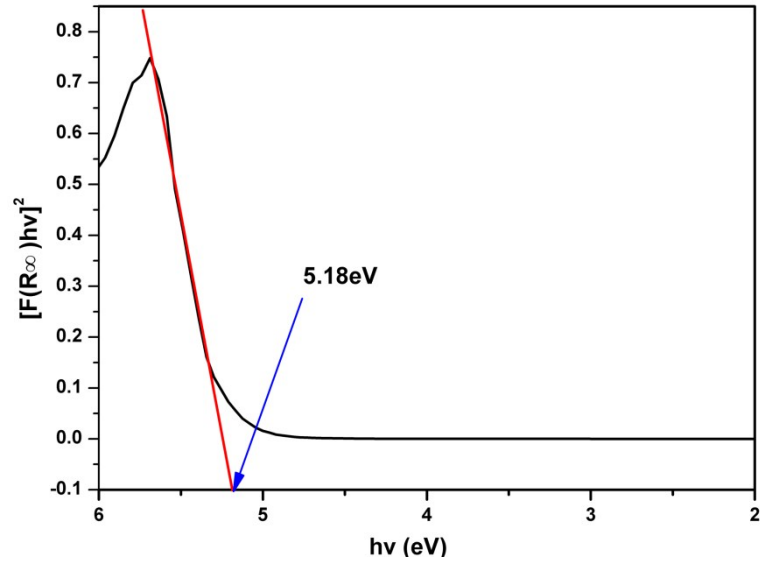

**Fig. S1.** Relationship between  $[F(R_\infty)hv]^2$  and  $hv$

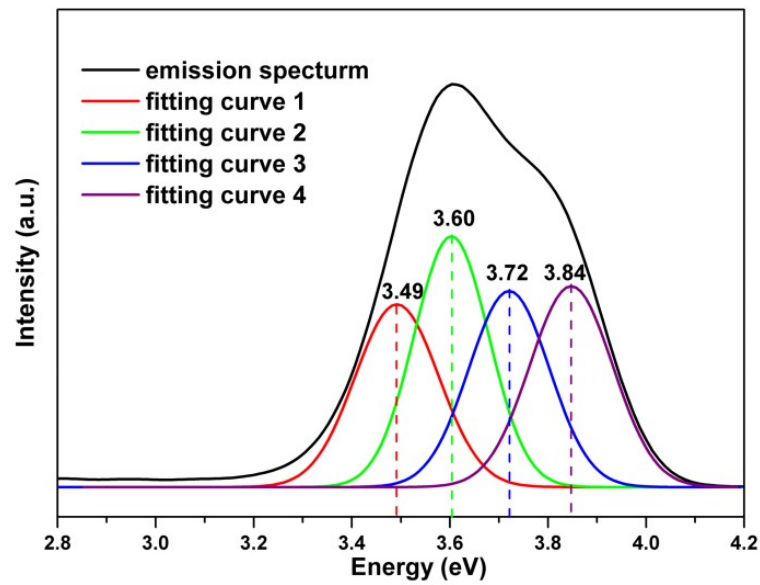

**Fig. S2.** The emission spectrum of LSPO:0.03Ce<sup>3+</sup> and its corresponding Gaussian components on an energy scale.

**Table S1.** Final refined structure parameters of LSPO:0.03Ce<sup>3+</sup> derived from the Rietveld refinement of X-ray diffraction data.

| Atom | Wyckof<br>f<br>position | x          | Y          | z          | Frac | Uiso   |
|------|-------------------------|------------|------------|------------|------|--------|
| Li1  | 4e                      | 0.279(8)   | 0.304(6)   | 0.314(9)   | 1.00 | 0.0250 |
| Li2  | 4e                      | 0.580(8)   | 0.223(6)   | 0.420(9)   | 1.00 | 0.0250 |
| Li3  | 4e                      | 0.943(9)   | 0.277(6)   | 0.295(8)   | 1.00 | 0.0250 |
| Sc1  | 4e                      | 0.2358(12) | 0.1020(8)  | 0.4521(10) | 0.97 | 0.0250 |
| Sc2  | 4e                      | 0.7549(11) | 0.3881(8)  | 0.4707(10) | 0.97 | 0.0250 |
| P1   | 4e                      | 0.0993(12) | 0.1514(10) | 0.1048(15) | 1.00 | 0.0250 |
| P2   | 4e                      | 0.60200    | 0.34760    | 0.10980    | 1.00 | 0.0250 |
| P3   | 4e                      | 0.03128    | 0.49864    | 0.25166    | 1.00 | 0.0250 |
| O1   | 4e                      | 0.43242    | 0.34080    | 0.13323    | 1.00 | 0.0250 |
| O2   | 4e                      | 0.9328(26) | 0.1570(21) | 0.1074(26) | 1.00 | 0.0250 |
| O3   | 4e                      | 0.3075(26) | 0.2753(17) | 0.4639(29) | 1.00 | 0.0250 |
| O4   | 4e                      | 0.84188    | 0.21651    | 0.50740    | 1.00 | 0.0250 |
| O5   | 4e                      | 0.1587(24) | 0.0458(18) | 0.0375(24) | 1.00 | 0.0250 |
| O6   | 4e                      | 0.65120    | 0.46460    | 0.08220    | 1.00 | 0.0250 |
| O7   | 4e                      | 0.4615(27) | 0.0772(20) | 0.3866(25) | 1.00 | 0.0250 |
| O8   | 4e                      | 0.9522(27) | 0.4049(24) | 0.3086(23) | 1.00 | 0.0250 |
| O9   | 4e                      | 0.1637(27) | 0.4292(24) | 0.1616(26) | 1.00 | 0.0250 |
| O10  | 4e                      | 0.6047(27) | 0.0682(22) | 0.1664(28) | 1.00 | 0.0250 |
| O11  | 4e                      | 0.1899(32) | 0.1885(21) | 0.2270(29) | 1.00 | 0.0250 |
| O12  | 4e                      | 0.6320(29) | 0.3025(21) | 0.2887(28) | 1.00 | 0.0250 |
| Ce1  | 4e                      | 0.2358(12) | 0.1020(8)  | 0.4521(10) | 0.03 | 0.0250 |
| Ce2  | 4e                      | 0.7549(11) | 0.3881(8)  | 0.4707(10) | 0.03 | 0.0250 |

Cell parameters:  $a = 8.8537(4) \text{ \AA}$ ,  $b = 12.2964(5) \text{ \AA}$ ,  $c = 8.8082(3) \text{ \AA}$ ,  
 $\gamma = 90.06(1)^\circ$ ,  $V = 958.94(7) \text{ \AA}^3$ ;  $Z = 4$ ;  
space group:  $P2_1/c$  (14);  
Reliability factors:  $R_{wp} = 9.41\%$ ,  $R_p = 6.60\%$

**Table S2.** CIE coordinates of typical prepared LSPO:Ce<sup>3+</sup>,Tb<sup>3+</sup> samples.

| Sample No. | composition                                       | CIE Coordinates (x, y) |
|------------|---------------------------------------------------|------------------------|
| 1          | LSPO:0.04Ce <sup>3+</sup> ,0.0025Tb <sup>3+</sup> | (0.2645, 0.5194)       |
| 2          | LSPO:0.04Ce <sup>3+</sup> ,0.005Tb <sup>3+</sup>  | (0.2654, 0.5372)       |
| 3          | LSPO:0.04Ce <sup>3+</sup> ,0.01Tb <sup>3+</sup>   | (0.2699, 0.5152)       |
| 4          | LSPO:0.04Ce <sup>3+</sup> ,0.02Tb <sup>3+</sup>   | (0.2697, 0.4990)       |
| 5          | LSPO:0.04Ce <sup>3+</sup> ,0.03Tb <sup>3+</sup>   | (0.2658, 0.4649)       |
| 6          | LSPO:0.005Ce <sup>3+</sup> ,0.05Tb <sup>3+</sup>  | (0.2595, 0.3481)       |
| 7          | LSPO:0.01Ce <sup>3+</sup> ,0.05Tb <sup>3+</sup>   | (0.2645, 0.3974)       |
| 8          | LSPO:0.02Ce <sup>3+</sup> ,0.05Tb <sup>3+</sup>   | (0.2677, 0.4522)       |
| 9          | LSPO:0.03Ce <sup>3+</sup> ,0.05Tb <sup>3+</sup>   | (0.2687, 0.4675)       |
| 10         | LSPO:0.04Ce <sup>3+</sup> ,0.05Tb <sup>3+</sup>   | (0.2701, 0.4952)       |
